# Supplementary material for: The effects of a mobile app-delivered intervention in people with symptomatic hand osteoarthritis: a pragmatic randomized controlled trial
Source: PubMed Central journal article supplement — Eur J Phys Rehabil Med. 2023 Jan 12;59(1):54–64. doi: 10.23736/S1973-9087.22.07744-9 (PMC10035439; doi:10.23736/s1973-9087.22.07744-9), 2023-01-12
Supplement: Supplementary_Digital_Material1.pdf [file Supplementary_Digital_Material1.pdf]

SUPPLEMENTARY DIGITLA MATERIAL 1

Supplementary Table I.—Summary of the interventions included in the present study, following the TIDieR recommendations.

| <b>TIDieR Item</b>    | <b>Description</b>                                                                                                                                                                                                                                             |                                                                                                                                               |
|-----------------------|----------------------------------------------------------------------------------------------------------------------------------------------------------------------------------------------------------------------------------------------------------------|-----------------------------------------------------------------------------------------------------------------------------------------------|
| <b>BRIEF NAME</b>     | CareHand                                                                                                                                                                                                                                                       |                                                                                                                                               |
| <b>WHY</b>            | Active self-management strategies, together with exercise and education are recommended for the management of hand OA, although lack of long-term adherence to treatment may limit the purported efficacy. mHealth devices are emerging to address this issue. |                                                                                                                                               |
|                       | <b>CareHand app</b>                                                                                                                                                                                                                                            | <b>Usual Care</b>                                                                                                                             |
| <b>WHAT</b>           | A smartphone app including a home exercise program (with training dose based on self-reported pain intensity), educational and self-management strategies                                                                                                      | Home exercise program with dose and explanations in a paper sheet.                                                                            |
| Material Participants | Training program, self-management strategies and monitoring system included in a digital app available in Spanish for iOS and Android devices (Figure 1 and supplementary table III).<br><br>A unique access code was given to each participant.               | A written exercise program and recommendations, including with images on a paper sheet (Supplementary table II).                              |
| Material Procedures   | Initial appointment and baseline evaluation.<br><br>Introductory face-to-face session to provide code access and explanation of the smartphone app. Any doubt was resolved.                                                                                    | Initial appointment and baseline evaluation<br><br>Introductory face-to-face session to explain the exercise program. Any doubt was resolved. |

|                          |                                                                                                                                                                                                                                                                                                                                                                                                                 |                                                                                                                                                                                                                                                                                                                                                                                                                            |
|--------------------------|-----------------------------------------------------------------------------------------------------------------------------------------------------------------------------------------------------------------------------------------------------------------------------------------------------------------------------------------------------------------------------------------------------------------|----------------------------------------------------------------------------------------------------------------------------------------------------------------------------------------------------------------------------------------------------------------------------------------------------------------------------------------------------------------------------------------------------------------------------|
|                          | <p>Telephone calls once a month to monitor adherence and solve eventual problems.</p> <p>Self-reported questionnaires for pain and function were filled in using the app and monitored by one researcher.</p> <p>Follow-up appointment (telephone or supervised).</p>                                                                                                                                           | <p>Telephone calls once a month to monitor adherence and solve eventual problems.</p> <p>Follow-up appointment (telephone or supervised).</p>                                                                                                                                                                                                                                                                              |
| <b>WHO PROVIDES</b>      | Physical therapist with expertise in hand therapy, upper limb rehabilitation and the use of new technologies.                                                                                                                                                                                                                                                                                                   | Physical therapist with expertise in hand therapy, upper limb rehabilitation and the use of new technologies.                                                                                                                                                                                                                                                                                                              |
| <b>HOW</b>               | Intervention was delivered using a smartphone app.                                                                                                                                                                                                                                                                                                                                                              | Intervention was delivered on a written paper sheet.                                                                                                                                                                                                                                                                                                                                                                       |
| <b>WHERE</b>             | The training program was performed at home.                                                                                                                                                                                                                                                                                                                                                                     | The training program was performed at home.                                                                                                                                                                                                                                                                                                                                                                                |
| <b>WHEN AND HOW MUCH</b> | <p>Intervention started after an introductory session and lasted 3 months. Treatment was performed 4 times a week for 15-20 minutes, depending on symptoms and exercise dose.</p> <p>Number of repetitions and exercises was increased (if possible) every 2 weeks based on pain intensity (this was made automatically by the app).</p> <p>Baseline training dose is described in supplementary table III.</p> | <p>Intervention started after an introductory session and lasted 3 months. Treatment was performed 4 times a week for 15-20 minutes, depending on symptoms and exercise dose.</p> <p>Number of repetitions and exercises was increased (if possible) every 2 weeks based on pain intensity. This was made according to the patient's sensations.</p> <p>Baseline training dose is described in supplementary table II.</p> |

|                            |                                                                                                                                                                                             |                                                                                                                                                                                                  |
|----------------------------|---------------------------------------------------------------------------------------------------------------------------------------------------------------------------------------------|--------------------------------------------------------------------------------------------------------------------------------------------------------------------------------------------------|
| <b>TAILORING</b>           | <p>Exercises.</p> <p>Number of repetitions, range of movement and intensity were tailored to pain intensity and protocol phase (every 2 weeks). This was made automatically by the app.</p> | <p>Exercises.</p> <p>Number of repetitions, range of movement, and intensity were tailored according to pain intensity and protocol phase (every 2 weeks). This was made by the participant.</p> |
| <b>MODIFICATIONS</b>       | No modifications were applied during the trial.                                                                                                                                             | No modifications were applied during the trial.                                                                                                                                                  |
| <b>HOW WELL</b><br>Planned | <p>Exercise adherence and self-reported pain and function.</p> <p>Adherence to exercises was recorded by the app. This information was monitored by one researcher.</p>                     | Exercise adherence and self-reported pain and function.                                                                                                                                          |
| <b>HOW WELL</b><br>Actual  | Follow-up phone calls were made to monitor adherence and progression.                                                                                                                       | Follow-up phone calls were made to monitor adherence and progression.                                                                                                                            |

Supplementary Table II.—Description of the home exercise program in the usual care group.

| Exercise                                                                                                                                  | Sets | Reps  |
|-------------------------------------------------------------------------------------------------------------------------------------------|------|-------|
| 1. Gently make a fist and then relax. It may be easier with your hand immersed in warm water, or harder when squeezing a rubber ball.     | 2    | 15-20 |
| 2. Extend your wrist over a table, with open hand and fingers extended.                                                                   | 2    | 15-20 |
| 3. Open and close your fingers with your hand over a table. The fingers should remain in extension.                                       | 2    | 15-20 |
| 4. Use your thumb pad to touch each one of the other fingers pads.                                                                        | 2    | 15-20 |
| 5. Flex and extend your wrist, while keeping a semi-closed fist.                                                                          | 2    | 15-20 |
| 6. Move your wrist laterally, with open and fingers extended.                                                                             | 2    | 15-20 |
| 7. Rotate your wrist, while keeping a semi-closed fist.                                                                                   | 2    | 15-20 |
| 8. Extend your elbow so the upper limb hangs freely along your body side. Try to perform this exercise in sitting and standing positions. | 2    | 10    |
| 9. Raise your upper limb laterally with the elbow extended                                                                                | 2    | 10    |
| 10. Starting from the position of exercise #9, touch your shoulder with the hand on the same side.                                        | 2    | 10    |

Note: Exercises should be performed within the pain-free tolerable range of motion

Supplementary Table III.—Description of the home exercise program in the CareHand group.

| Exercise                                                                                                                                                       | Sets | Reps.         |
|----------------------------------------------------------------------------------------------------------------------------------------------------------------|------|---------------|
| 1. Put your hand into warm water and move your hand and fingers.                                                                                               | 1    | 5-10<br>min.  |
| 2. Use your thumb pad to touch each one of the other fingers pads drawing an ‘O-sign’.                                                                         | 1    | 10            |
| 3. Try to flex the proximal and distal IP joints of all fingers (except the thumb) while keeping the MCP extended.                                             | 1    | 10            |
| 4. Try to flex the MCP joints of the 2 <sup>nd</sup> to 5 <sup>th</sup> finger while keeping the IF joints extended.                                           | 1    | 10            |
| 5. Isometric thumb abduction, at 50% of your MVC. Resist the movement with the other hand.                                                                     | 2    | 10            |
| 6. Isotonic thumb abduction. Resist the movement with a rubber band (placed below the knuckles). You can increase resistance using different TheraBand colors. | 2    | 10            |
| 7. Squeeze a rolled towel using the 50% of your MVC.                                                                                                           | 2    | 10            |
| 8. Place your hand over a table and stretch your fingers one by one, using your other hand. Use a firm, but rather comfortable pressure.                       | 1    | 30-60<br>sec. |

IP: interphalangeal; MCP: metacarpophalangeal; MVC: maximum voluntary contraction.
